# Supplementary material for: P-bodies directly regulate MARF1-mediated mRNA decay in human cells
Source: PubMed Central journal article supplement — Nucleic Acids Res. 2022 Jul 8;50(13):7623–36. doi: 10.1093/nar/gkac557 (PMC9303261; doi:10.1093/nar/gkac557), 2022-07-08
Supplement: gkac557_supplemental_file.pdf [file gkac557_supplemental_file.pdf]

**A**

```

H. sapiens ILEVPESHTASELKLGDGSGPSHTEQQLLRRLTDDSPVDLLCAPVPSCLPSPQLRPDPVI 1644
X. tropicalis -----MDKEL--LCLTSPMDLLCGVPVPSCLPSPQLHPDPVV 1588
D. rerio A-----TTSPASGELELLCLSSSAVDLLCAPVPSCLPSPALRPDPVQ 1408
: * * * * :****.***** * :****

H. sapiens LQSADLIQFEERPQEPSEIMILNQEEMEIPIPGKSKT--LTSDDSSSCISAAPVPPCP 1702
X. tropicalis TQPADLIQFEEHFHFDLVYP---EETQYNPLCNGTQPCNFPTSADLDTFSEPSTQNICP 1645
D. rerio --PPDLMHFQPPVNH-----PPDLMHFQPPVNH-----QPRP 1425
**:*: * :

H. sapiens SSETSESLLSKDPVESPAKQPKNRVKLAANFSLAPITKL 1742
X. tropicalis Q---ESKSTKELPESPVKRQHRNRVKLAANFSFAPVTKL 1681
D. rerio ANGSDPAQPSAGVWDSFARRSARSRVRLAANFSFTAAPV 1465
: : :**.:. :.**.*****.: :

```

**B**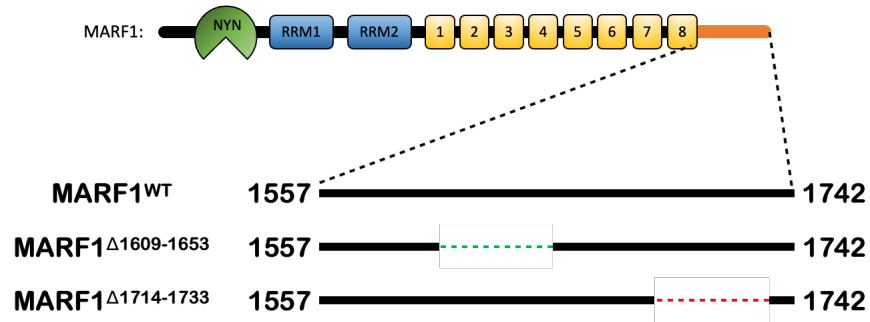**C**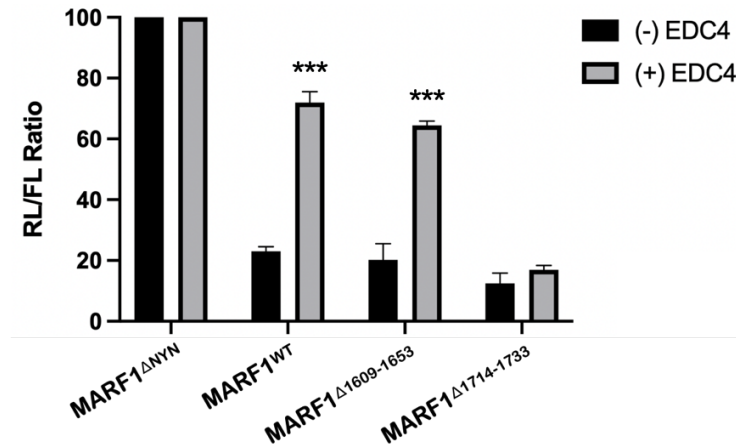**D**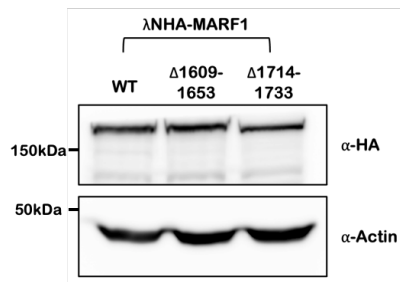**E**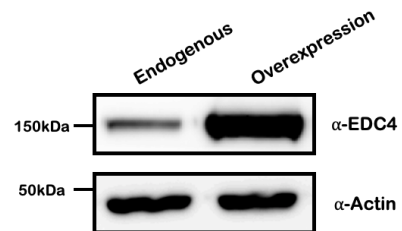

**Figure S1.** (A) Phylogenetic alignment of the MARF1 C-terminal regions found within the annotated species. Two conserved regions were identified 1609-1653 (green) and 1714-1733 (red). Conserved residues are marked with (\*), while conservative substitutions are marked with (:), and semi-conservative substitutions are marked with (.). (B) Schematic diagram of the MARF1 C-terminal deletion mutants generated. (C) Western blot analysis of MARF1 C-terminal deletion mutants. (D) RL-MAML1 activity detected in extracts of transfected HeLa cells expressing the annotated proteins and FL as a transfection normalization control. Histograms represent the mean RL activity detected from three experiments, normalized to FL activity and the RL/FL ratio of a catalytically inactive MARF1 (MARF1<sup>ΔNYN</sup>) set to 100. Error bars represent the SEM and statistical significance was calculated using a two-tailed T-test comparing RL activity in the (+) to (-) EDC4 overexpression samples (\*\*\*) =  $p < 0.001$ ). (E) Western blot analysis of EDC4-overexpression in MARF1<sup>WT</sup> expressing cells.

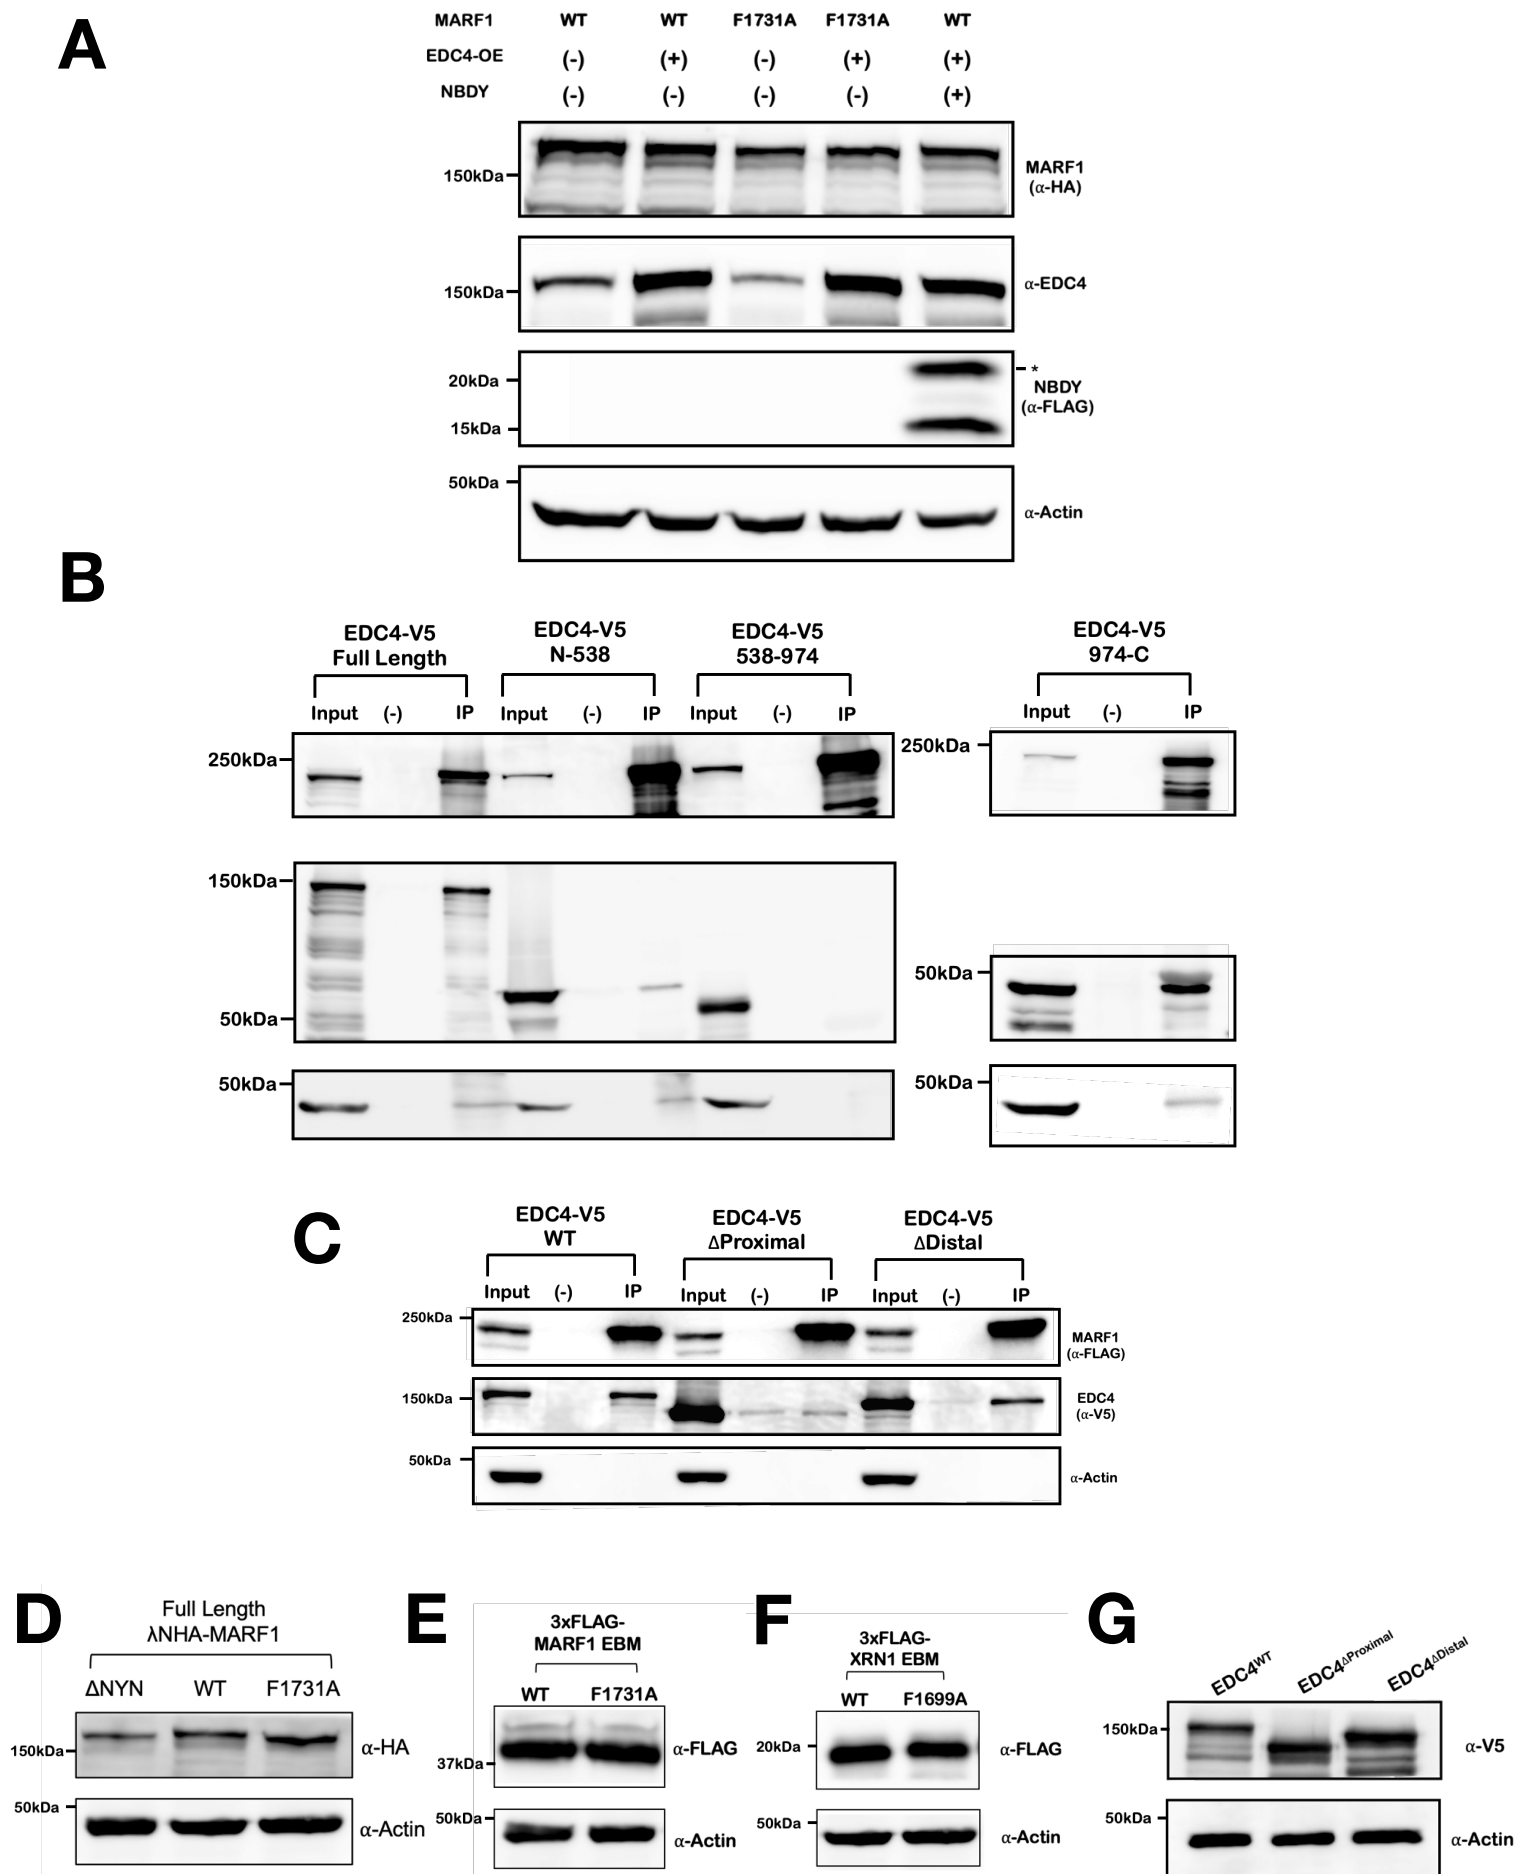

Figure S2.

**Figure S2.** (A) Western blots of HeLa lysates obtained from actinomycin D treatment experiments in figures 1F and 6C. The (\*) denotes NBDY harboring a possible PTM that is consistent with the doublet observed by D'Lima *et al.* (2017). (B&C) Additional images of western blots from co-immunoprecipitation experiments corresponding to Figure 2B. (D-F) Western blots from HeLa cell extracts from the corresponding luciferase experiments (Figures 3B & 6D-G) expressing the indicated proteins. (E) Western blots from HeLa cell extracts expressing EDC4<sup>WT</sup> or  $\alpha$ -Helical deletion mutants.

**A**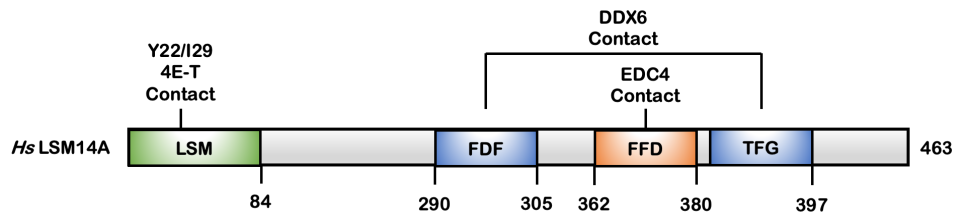**B**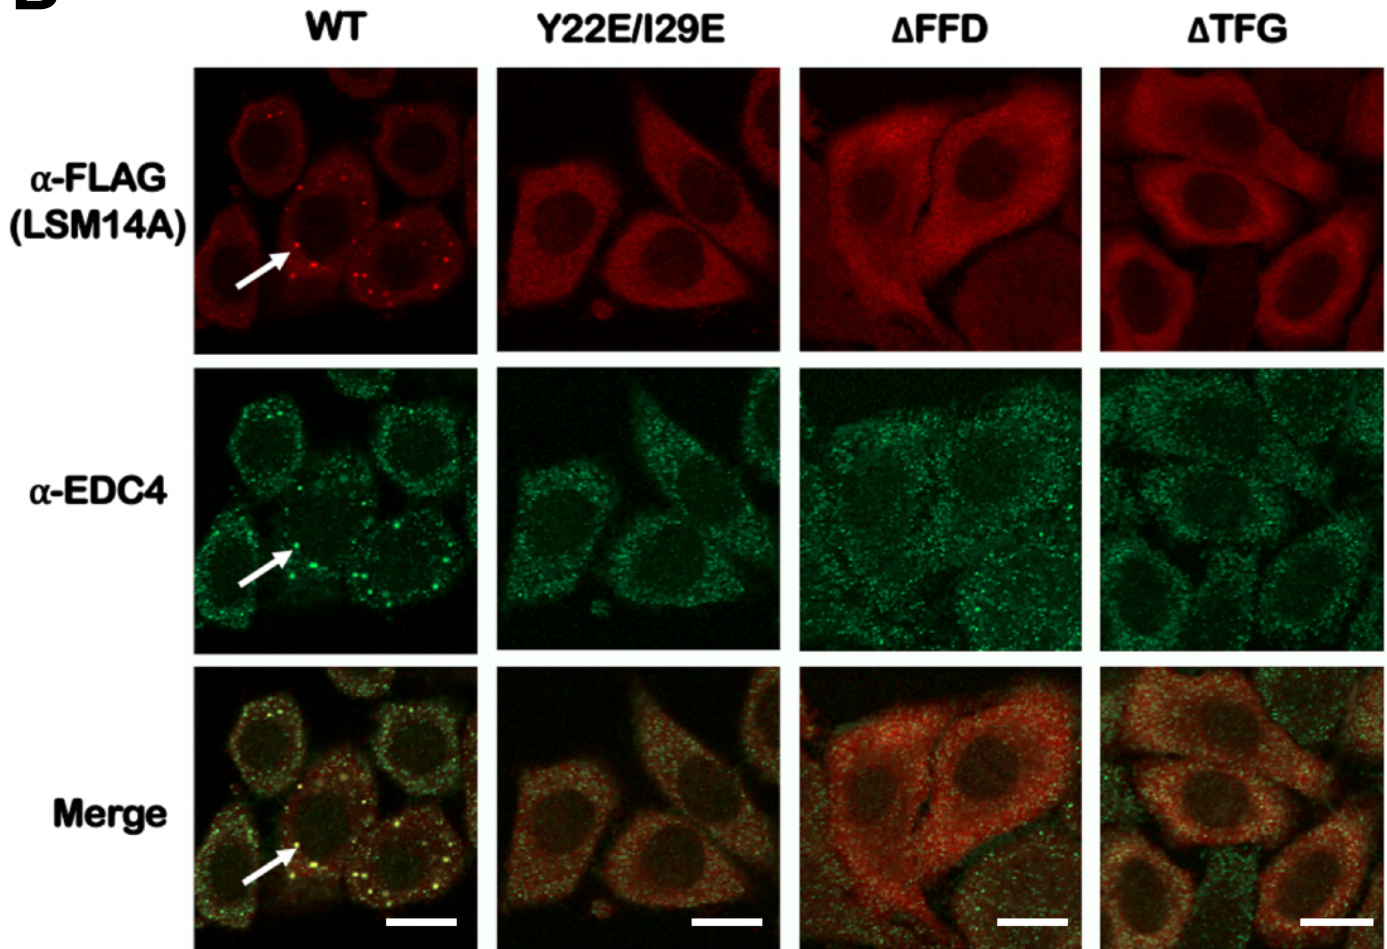**C**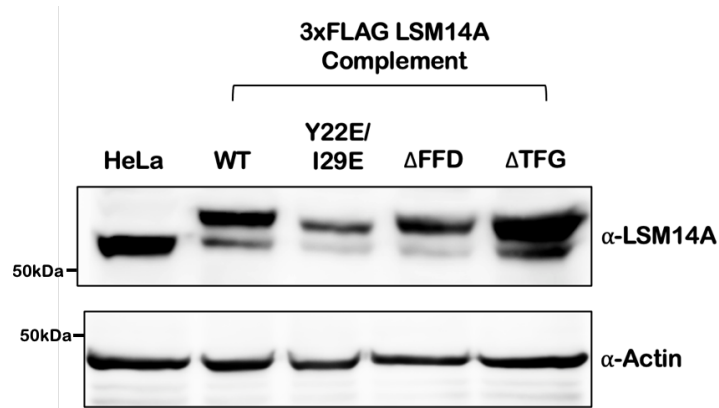

**Figure S3.** (A) Schematic diagram of the LSM14A protein structure, highlighted at positions which maintain key protein interactions that are required to support P-body formation. (B) Images generated through confocal microscopy of immunofluorescent staining of non-transfected HeLa cells stably expressing FLAG-tagged LSM14A. The merged image represents the overlap of the  $\alpha$ -FLAG (red) and  $\alpha$ -EDC4 (green) signals and scale bars represent 20 $\mu$ m. White arrows mark visible P-bodies as defined by the concentrated signal overlap of FLAG-LSM14A and EDC4. (C) Western blots of complemented FLAG-LSM14A cell lines.

**A**

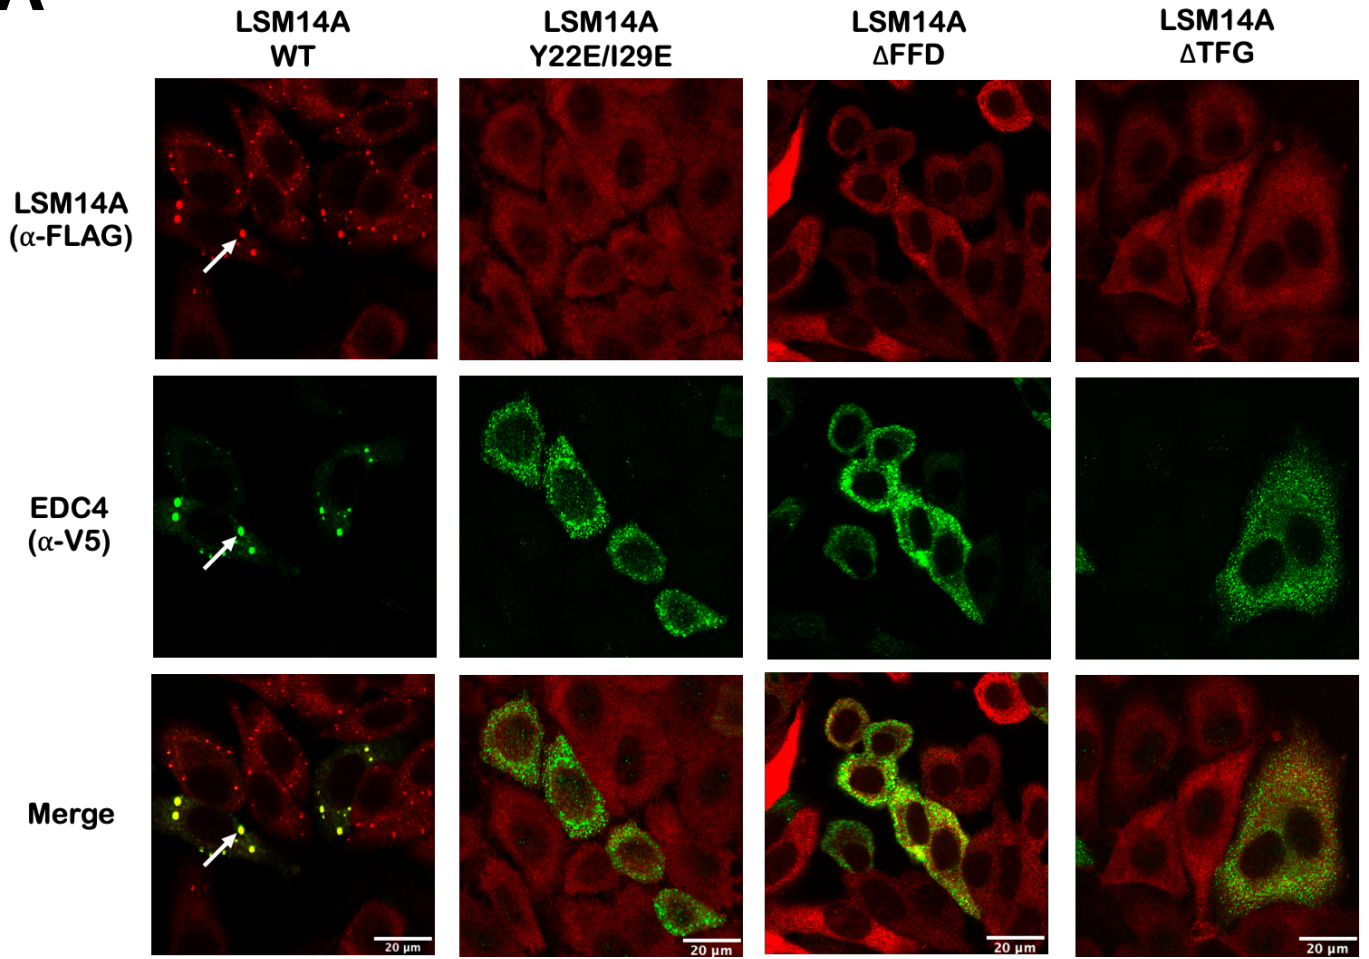

Figure S4.

**Figure S4.** (A) Additional fields of view corresponding to cells in Figure 5A. Images were generated through confocal microscopy of immunofluorescent staining of HeLa cells stably expressing FLAG-tagged LSM14A variants as indicated. Cells were transfected with V5-tagged EDC4 prior to staining. The merged image represents the overlap of the  $\alpha$ -FLAG (red) and  $\alpha$ -V5 (green) signals and scale bars represent 20 $\mu$ m. White arrows indicate P-bodies as defined by intense signal overlap between red and green staining.



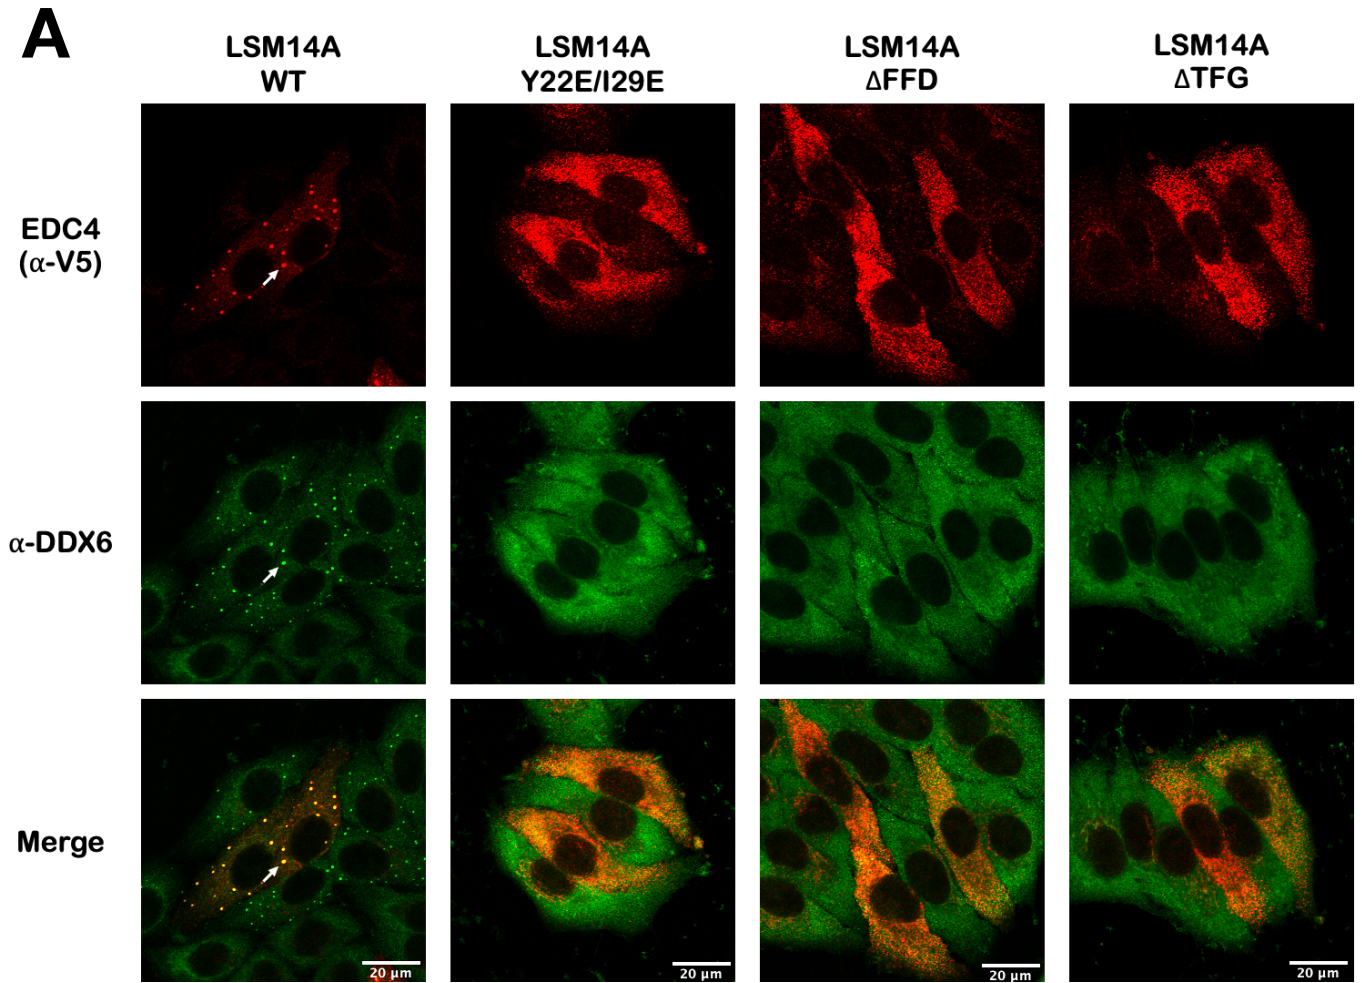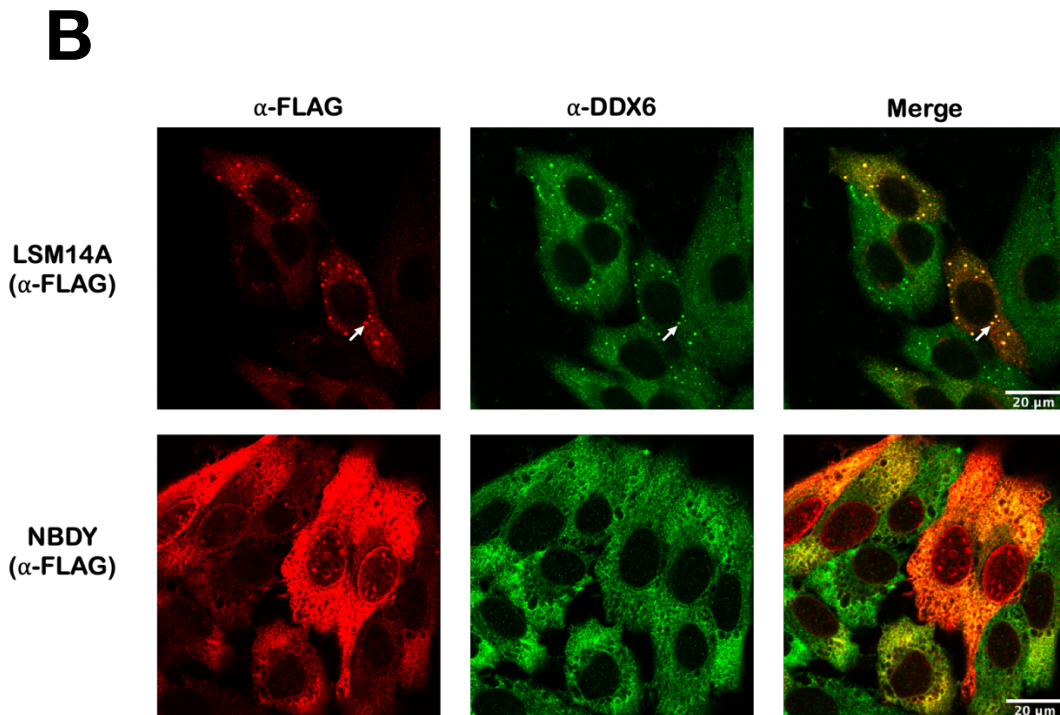

Figure S5.

**Figure S5.** (A) Images generated through confocal microscopy of immunofluorescent staining of HeLa cells stably expressing FLAG-tagged LSM14A and overexpressing V5-EDC4. The merged image represents the overlap of the  $\alpha$ -V5 (red) and  $\alpha$ -DDX6 (green) signals and scale bars represent 20 $\mu$ m. White arrows mark visible P-bodies as defined by the concentrated signal overlap of V5-EDC4 and DDX6. (B) Images generated through confocal microscopy of immunofluorescent staining WT HeLa cell. Cells were transfected with either FLAG-LSM14A (top) or FLAG-NBDY (bottom) prior to staining. The merged image represents the overlap of the  $\alpha$ -FLAG (red) and  $\alpha$ -DDX6 (green) signals and scale bars represent 20 $\mu$ m. White arrows represent P-bodies as defined by foci with strong signal overlap between red and green staining.

## Supplemental Materials and Methods:

### qPCR Information:

| Gene               | Oligos                                                                  | Location | Accession Number | Amplicon Length | Specificity Screen |
|--------------------|-------------------------------------------------------------------------|----------|------------------|-----------------|--------------------|
| MAML1              | Fwd:<br>GACTCTCTCAACAAAAGCGTCT<br><br>Rev: AGGAAATGACTCACTGGGGTTA       | Exon 2   | NM_014757.5      | 78bp            | Primer BLAST       |
| GAPDH              | Fwd:<br>GTGGAGATTGTTGCCATCAACGA<br><br>Rev: CCCATTCTCGGCCTTGACTGT       | Exon 2-3 | NM_002046        | 104bp           | Primer BLAST       |
| Renilla Luciferase | Fwd:<br>GAGTTCGCTGCCTACCTGGAGCCAT<br><br>Rev:<br>GGATCTCGCGAGGCCAGGAGAG | N/A      | MN030571         | 79bp            | Primer BLAST       |

### Site-directed mutagenesis primer list:

| Deletion/Mutation           | Primers                                                                                                 |
|-----------------------------|---------------------------------------------------------------------------------------------------------|
| MARF1 <sup>Δ1609-1653</sup> | Fwd: CCCAGTCACACAGAGCAGCCTCAAGAGCCTTCTGAAATTATG<br>Rev: TTCAGAAGGCTCTTGAGGCTCCTGCTCTGTGTGACTGGGCC       |
| MARF1 <sup>Δ1714-1733</sup> | Fwd: CTCAGCAAGGACCCCGTGTAGCACCTATAACCAAGCTTTAA<br>Rev: TTAAAGCTTGTTATAGGCACGGGGTCCTTGCTGAGCAGTGA        |
| MARF1 <sup>F1731A</sup>     | Fwd: GAGTCAAATTGGCAGCCAACgccTCCTTAG<br>Rev: AGGTGCTAAGGAggcGTTGGCTGCCAATTT                              |
| XRN1-EBM <sup>F1699A</sup>  | Fwd: GAAAACTGGCTGTTAAgccTGGTGTCTTCTAAACCTTCTGAG<br>Rev: TTTAGAAACACCAggcTTAACAGCCAGTTTTCTTGATTTTCT      |
| EDC4 <sup>ΔProximal</sup>   | Fwd: gccaggaagagctgctgcagcatatcctgcagctgctgcagcagg<br>Rev: tgcagcagctgcaggatatgctgcagcagctcttctggctgtgc |
| EDC4 <sup>ΔDistal</sup>     | Fwd: actgccaggcccagcaagccggcctcgtgacccccagcctcct<br>Rev: agggaggctgggggtcacgagggcttgctgggctggcagtcaag   |
